# Supplementary material for: Hyperlipidemia affects the absorption, distribution and excretion of seven catechins in rats following oral administration of tea polyphenols
Source: Royal Society of Chemistry journal article supplement (doi:10.1039/c5ra19699j), 2015-01-01

**ESI-Table 1** The weights and lipids levels in plasma of normal rats and obesity rats

| Index                      | Normal group | Obesity         |
|----------------------------|--------------|-----------------|
| Total glycerides (mmol/L)  | 0.92±0.23    | 1.09±0.36       |
| Total Cholesterol (mmol/L) | 3.11±0.49    | 4.62±0.55***    |
| HDL-C (mmol/L)             | 2.24±0.61    | 1.27±0.42*      |
| LDL-C (mmol/L)             | 1.88±0.31    | 2.33±0.07**     |
| Weight (g)                 | 395.04±15.09 | 471.83±33.89*** |

\*p<0.05, \*\*p<0.01 and \*\*\*p<0.001 compared with normal group.

**ESI-Table 2** The weight of main organs of obesity and normal rats

| Index           | Normal rats | Obesity rats |
|-----------------|-------------|--------------|
| Stomach         | 1.43±0.33   | 1.69±0.24    |
| Small intestine | 4.76±0.96   | 4.49±0.92    |
| Colon           | 0.82±0.18   | 0.70±0.13    |

**ESI-Table 3** Calibration curve and linear range of the seven catechins in stomach

| Analytes | Calibration curve  | r      | Linear range<br>(ng/mL) |
|----------|--------------------|--------|-------------------------|
| EC       | $y=0.0015x+0.0005$ | 0.9984 | 10-10000                |
| EGC      | $y=0.0016x-0.0006$ | 0.9994 | 10-10000                |
| ECG      | $y=0.0068x+0.0051$ | 0.9979 | 10-10000                |
| EGCG     | $y=0.0021x+0.0192$ | 0.9991 | 50-20000                |
| C        | $y=0.0011x+0.0028$ | 0.9981 | 10-5000                 |
| GC       | $y=0.0018x+0.0022$ | 0.9964 | 10-5000                 |
| GCG      | $y=0.0050x+0.0037$ | 0.9993 | 10-5000                 |

**ESI-Table 4** Calibration curve and linear range of the seven catechins in small intestine

| Analytes | Calibration curve  | r      | Linear range (ng/mL) |
|----------|--------------------|--------|----------------------|
| EC       | $y=0.0010x-0.0003$ | 0.9989 | 10-10000             |
| EGC      | $y=0.0010x-0.0023$ | 0.9987 | 10-10000             |
| ECG      | $y=0.0029x+0.0004$ | 0.9993 | 10-10000             |
| EGCG     | $y=0.0019x+0.0027$ | 0.9988 | 50-20000             |
| C        | $y=0.0008x-0.0011$ | 0.9993 | 10-5000              |
| GC       | $y=0.0008x-0.0005$ | 0.9984 | 10-5000              |
| GCG      | $y=0.0023x+0.0001$ | 0.9975 | 10-5000              |

**ESI-Table 5** Calibration curve and linear range of the seven catechins in colon

| Analytes | Calibration curve  | r      | Linear range<br>(ng/mL) |
|----------|--------------------|--------|-------------------------|
| EC       | $y=0.0025x-0.0016$ | 0.9981 | 10-10000                |
| EGC      | $y=0.0023x-0.0022$ | 0.9991 | 10-10000                |
| ECG      | $y=0.0071x+0.0130$ | 0.9984 | 10-10000                |
| EGCG     | $y=0.0040x+0.0092$ | 0.9989 | 50-20000                |
| C        | $y=0.0018x-0.0012$ | 0.9965 | 5-5000                  |
| GC       | $y=0.0024x+0.0031$ | 0.9992 | 5-5000                  |
| GCG      | $y=0.0052x-0.0033$ | 0.9969 | 5-5000                  |

### **Supplementary Figure Captions**

**ESI-Fig. 1** Time-dependent changes of catechins in circulation solution of stomach of normal ad obesity rats given tea polyphenols solution (350mg/kg)

\*p<0.05, \*\*p<0.01 compared with normal rats.

**ESI-Fig. 2** Time-dependent changes of catechins in circulation solution of small intestine of normal ad obesity rats given tea polyphenols solution (350 mg/kg)

\*p<0.05, \*\*p<0.01, \*\*\*p<0.001 compared with normal rats.

**ESI-Fig. 3** Time-dependent changes of catechins in circulation solution of colon of normal ad obesity rats given tea polyphenols solution (350 mg/kg)

\*p<0.05 compared with normal rats.

ESI-Fig. 1

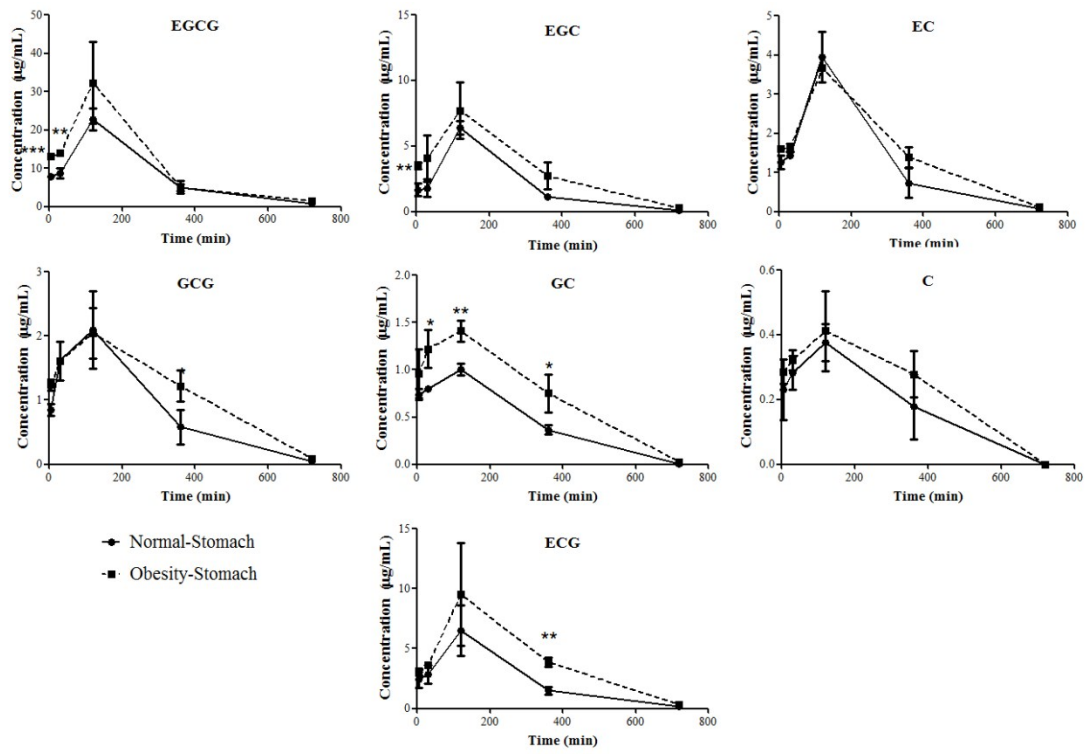

ESI-Fig. 2

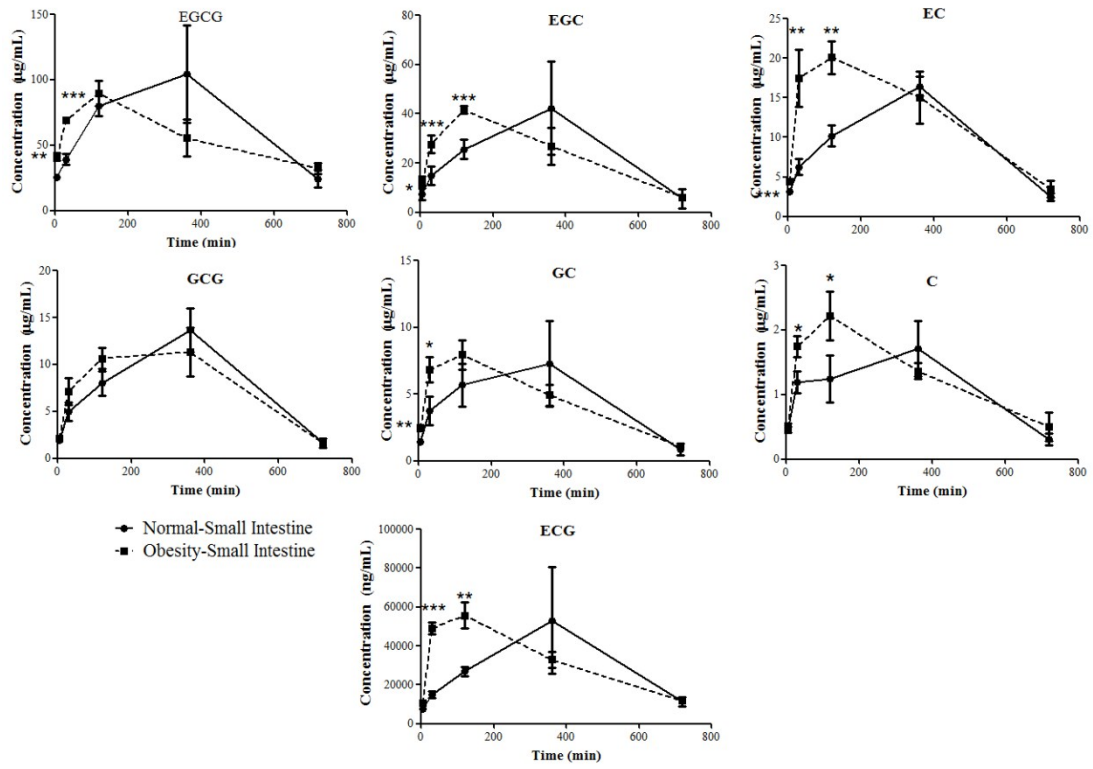



ESI-Fig. 3

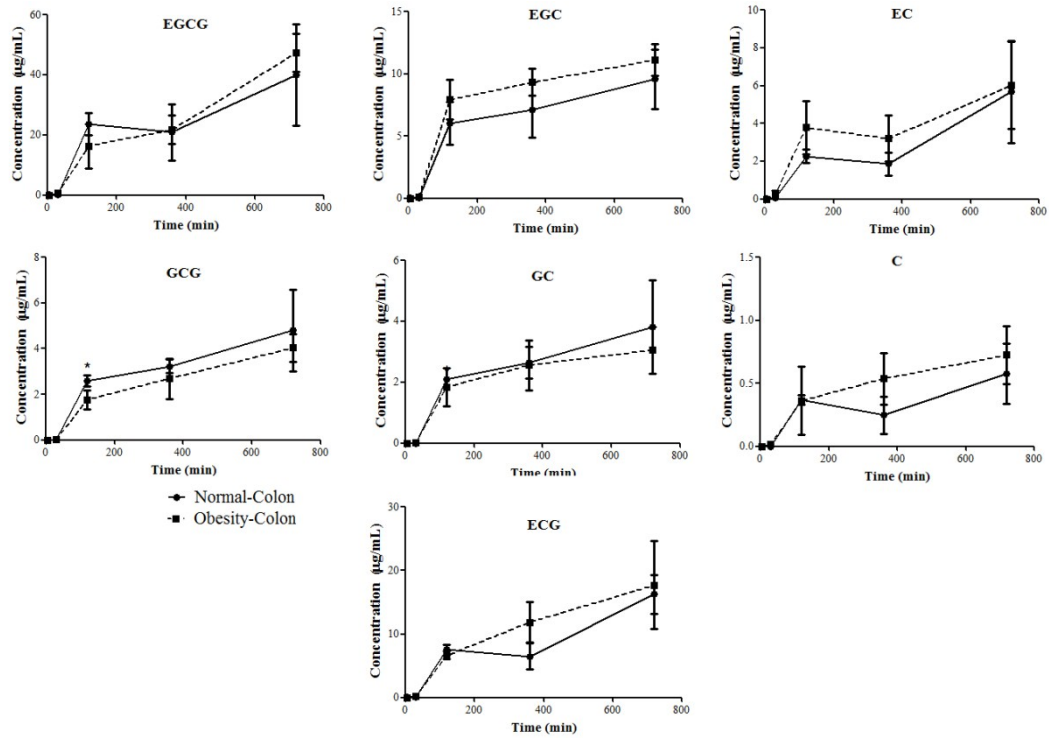

Supplement: c5ra19699j1.pdf [file c5ra19699j1.pdf]
